# Supplementary material for: Functionalized aluminum-catalyzed silicon nanowire formation and radial junction photovoltaic devices
Source: Royal Society of Chemistry journal article supplement (doi:10.1039/d1nr00312g), 2021-01-01
Supplement: d1nr00312g1.pdf [file d1nr00312g1.pdf]

## Supporting Information

### A Functionalized Aluminum-Catalyzed Silicon Nanowire Formation and Radial Junction Photovoltaic Device

Wipakorn Jevasuwan\* and Naoki Fukata\*

International Center for Materials Nanoarchitectonics, National Institute for Materials Science, 1-1 Namiki, Tsukuba, Ibaraki 305-0044, Japan

\*E-mail: [JEVASUWAN.Wipakorn@nims.go.jp](mailto:JEVASUWAN.Wipakorn@nims.go.jp); [FUKATA.Naoki@nims.go.jp](mailto:FUKATA.Naoki@nims.go.jp)

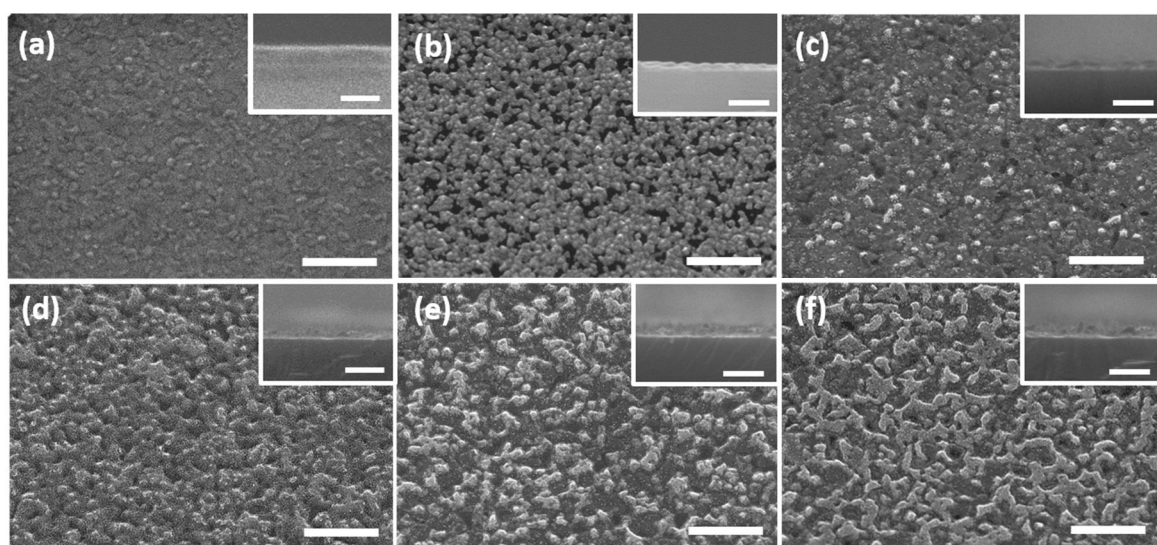

**Fig. S1** 30°-tilted SEM images of Al-catalyst on n-Si(111) substrates. (a) As-sputtered Al film of 50-nm thickness followed by (b) 1% HF etching for 10 sec and heating inside a CVD chamber to different growth temperatures of (c) 600 °C, (d) 650 °C, (e) 700 °C, and (f) 750 °C before VLS growth process. Scale bar is 500 nm. The cross-sectional images corresponding to each Al catalyst condition are shown in the inset. Scale bar is 100 nm.

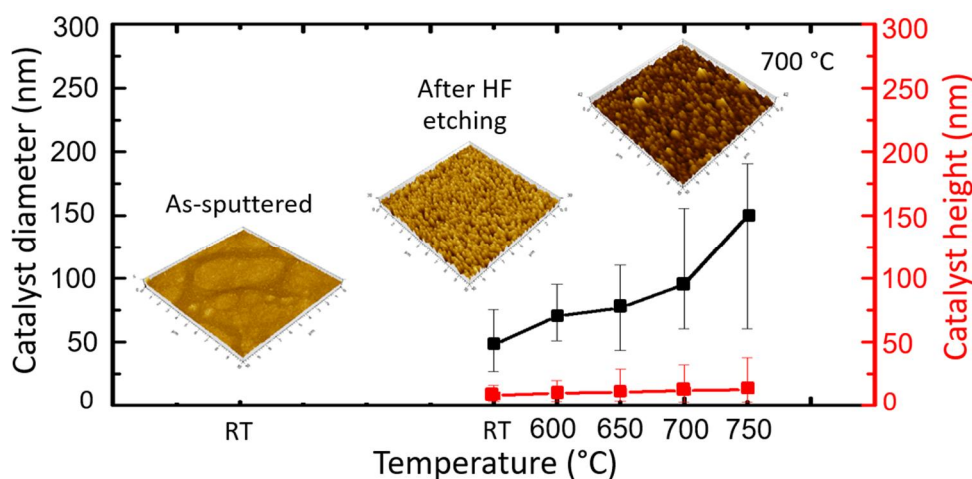

**Fig. S2** Al-catalyst diameter and height as a function of the heating temperature from 600 - 750 °C inside the CVD chamber after 1% HF etching for 10 sec. AFM images of Al-catalyst surfaces after sputtering, HF etching, and heating to 700 °C are represented.

**Table S1** Summarized mean values and standard deviations of NW length, tip and base diameters, VS (or radial) and VLS (or axial) growth rates of SiNWs grown at various temperatures of 600 °C, 650 °C, 700 °C, and 750 °C for 30 min. The data and statistics are based on 20-30 NWs of each condition.

| Growth Temperature (°C) | NW length (μm) | Tip diameter (μm) | Base diameter (μm) | VLS growth rate (nm/min) | VS growth rate (nm/min) |
|-------------------------|----------------|-------------------|--------------------|--------------------------|-------------------------|
| 600                     | 1.24 ± 1.03    | 0.08 ± 0.06       | 0.13 ± 0.05        | 41.3 ± 34.5              | 1.1 ± 0.8               |
| 650                     | 3.88 ± 1.98    | 0.06 ± 0.08       | 0.18 ± 0.06        | 122.5 ± 65.8             | 4.3 ± 0.9               |
| 700                     | 6.14 ± 1.83    | 0.08 ± 0.03       | 0.42 ± 0.05        | 201.3 ± 61.1             | 11.2 ± 1.1              |
| 750                     | 9.03 ± 1.93    | 0.14 ± 0.01       | 0.71 ± 0.04        | 300.6 ± 64.2             | 19.1 ± 1.8              |

**Table S2** Summarized mean values and standard deviations of NW length, tip and base diameters of SiNWs grown at 700 °C with various growth times of 5 min, 10 min, 20 min, and 30 min followed by post-annealing at 850 °C for 20 min. The data and statistics are based on around 20 NWs for each condition.

| Growth time (min) | NW length ( $\mu\text{m}$ ) | Tip diameter ( $\mu\text{m}$ ) | Base diameter ( $\mu\text{m}$ ) | VLS growth rate (nm/min) | VS growth rate (nm/min) |
|-------------------|-----------------------------|--------------------------------|---------------------------------|--------------------------|-------------------------|
| 5                 | $1.34 \pm 0.15$             | $0.04 \pm 0.02$                | $0.10 \pm 0.03$                 | $268.0 \pm 27.9$         | $6.1 \pm 0.9$           |
| 10                | $2.48 \pm 0.31$             | $0.05 \pm 0.02$                | $0.18 \pm 0.06$                 | $248.0 \pm 32.5$         | $6.5 \pm 0.9$           |
| 20                | $4.43 \pm 0.85$             | $0.08 \pm 0.03$                | $0.36 \pm 0.07$                 | $221.5 \pm 46.5$         | $7.1 \pm 1.0$           |
| 30                | $6.14 \pm 1.83$             | $0.08 \pm 0.03$                | $0.42 \pm 0.05$                 | $201.3 \pm 61.1$         | $11.2 \pm 1.1$          |

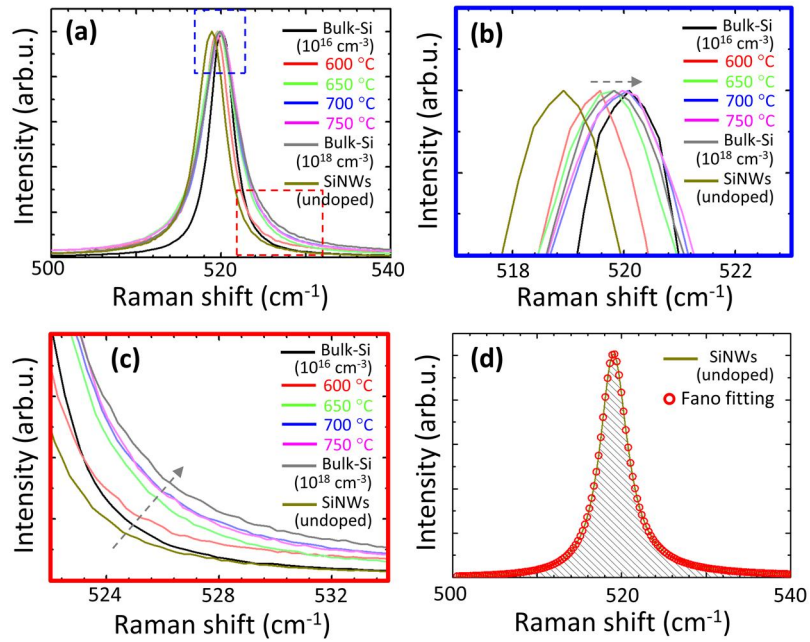

**Fig. S3** (a) Raman spectra, (b) Raman shift of Si optical phonon peak, and (c) asymmetrical broadening (part of half-width on the post maximum side) of SiNWs grown at various temperatures from 600 - 750 °C for 30 min and post-annealed at 850 °C for 20 min; comparison with p-type Si wafers with a B-doping concentration of  $10^{16} \text{ cm}^{-3}$  and  $10^{18} \text{ cm}^{-3}$ , and undoped Au-catalyzed SiNWs grown at 600 °C for 30 min and post-annealed at 850 °C

for 20 min. (d) The Raman spectrum of undoped Au-catalyzed SiNWs and the fitting data of the Si optical phonon peak using the Fano equation.

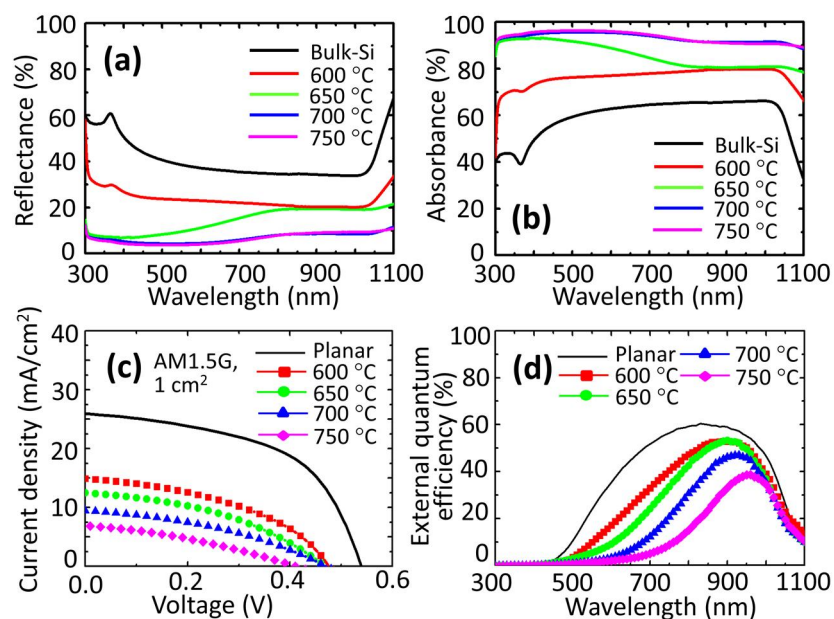

**Fig. S4** (a) Reflectance, and (b) absorbance spectra of Al-catalyzed SiNWs grown at various growth temperatures of 600 - 750 °C compared to bulk-Si. (c) J-V characteristics of solar cells measured under AM1.5G, and (d) the EQE.

**Table S3** Photovoltaic characteristics of SiNW-based solar cells with various SiNW growth temperatures compared to a planar cell.

| Growth Temperature (°C) | PCE (%) | J <sub>sc</sub> (mA/cm <sup>2</sup> ) | V <sub>oc</sub> (V) | FF (%) | R <sub>s</sub> (Ω cm <sup>2</sup> ) @ V = V <sub>oc</sub> | R <sub>sh</sub> (Ω cm <sup>2</sup> ) @ V = 0 V |
|-------------------------|---------|---------------------------------------|---------------------|--------|-----------------------------------------------------------|------------------------------------------------|
| - (Planar)              | 7.6     | 25.90                                 | 0.54                | 54.01  | 1.17                                                      | 111.30                                         |
| 600                     | 3.4     | 14.93                                 | 0.50                | 46.29  | 1.79                                                      | 131.82                                         |
| 650                     | 2.5     | 12.60                                 | 0.49                | 40.17  | 5.89                                                      | 140.02                                         |
| 700                     | 1.7     | 9.49                                  | 0.47                | 38.13  | 8.71                                                      | 162.58                                         |
| 750                     | 1.1     | 7.12                                  | 0.43                | 36.88  | 9.62                                                      | 157.61                                         |
